# Supplementary material for: Insulin Degludec in Type 1 Diabetes: A randomized controlled trial of a new-generation ultra-long-acting insulin compared with insulin glargine
Source: PubMed Central journal article supplement — Diabetes Care. 2011 Feb 17;34(3):661–5. doi: 10.2337/dc10-1925 (PMC3041203; doi:10.2337/dc10-1925), 2011-02-17

SUPPLEMENTARY DATA

**Supplementary Table 1. Insulin Antibodies (%B/T)**

| Week                                    |                  | IDeg(A)           | IDeg(B)           |
|-----------------------------------------|------------------|-------------------|-------------------|
| <b>Cross-reacting antibodies (%B/T)</b> |                  |                   |                   |
| <b>0</b>                                | n                | 57                | 60                |
|                                         | Median (min-max) | 4.5 (0 – 68.3)    | 4.5 (-0.1 – 53.7) |
| <b>18</b>                               | n                | 55                | 59                |
|                                         | Median (min-max) | 8.5 (0.6 – 70.8)  | 6.1 (0 – 72.1)    |
| <b>IDeg-specific antibodies (%B/T)</b>  |                  |                   |                   |
| <b>0</b>                                | n                | 59                | 60                |
|                                         | Median (min-max) | -0.2 (-1.0 – 5.8) | -0.2 (-2.0 – 1.5) |
| <b>18</b>                               | n                | 55                | 60                |
|                                         | Median (min-max) | -0.2 (-1.9 – 2.4) | -0.2 (-1.4 – 1.7) |
| <b>IAsp-specific antibodies (%B/T)</b>  |                  |                   |                   |
| <b>0</b>                                | n                | 58                | 60                |
|                                         | Median (min-max) | 0.7 (-0.1 – 14.6) | 0.9 (-0.8 – 17.8) |
| <b>18</b>                               | n                | 55                | 60                |
|                                         | Median (min-max) | 0.9 (-0.2 – 14.3) | 0.7 (-0.5 – 17.4) |

n: number of subjects; %B/T: percent bound over total; IGLar-specific antibodies were not measured in this trial.

**Supplementary Table 2. List of Principle Investigators**

| Country       | Principle Investigators                                                                                 |
|---------------|---------------------------------------------------------------------------------------------------------|
| Australia     | Tony Roberts, Andrew Lowy, Robert Moses, Geoff Nicholson and Murray Gerstman                            |
| Germany       | Ulrich Wendisch, Alexander Segner, Gerhard Klausmann, Stephan Maxeiner, Karsten Milek and Andrea Mölle  |
| Norway        | Kåre I. Birkeland, Svein Skeie, Sverre Madsbu, Stefnir Gudnason, Marianne Astor and Mikkel Høiberg      |
| Sweden        | Johan Jendle, Per-Eric Lins, Mona Landin-Olsson, Peter Fors and Ann-Sofie Bolmér                        |
| United States | Robert Ratner, Ronald Brazg, David Fitz-Patrick, Gregory Peterson, Michael Reeves, and Julio Rosenstock |

SUPPLEMENTARY DATA

Supplementary Figure 1: Mean 9-point SMPG Profiles at baseline (Panel A) and after 16 weeks of treatment (Panel B).

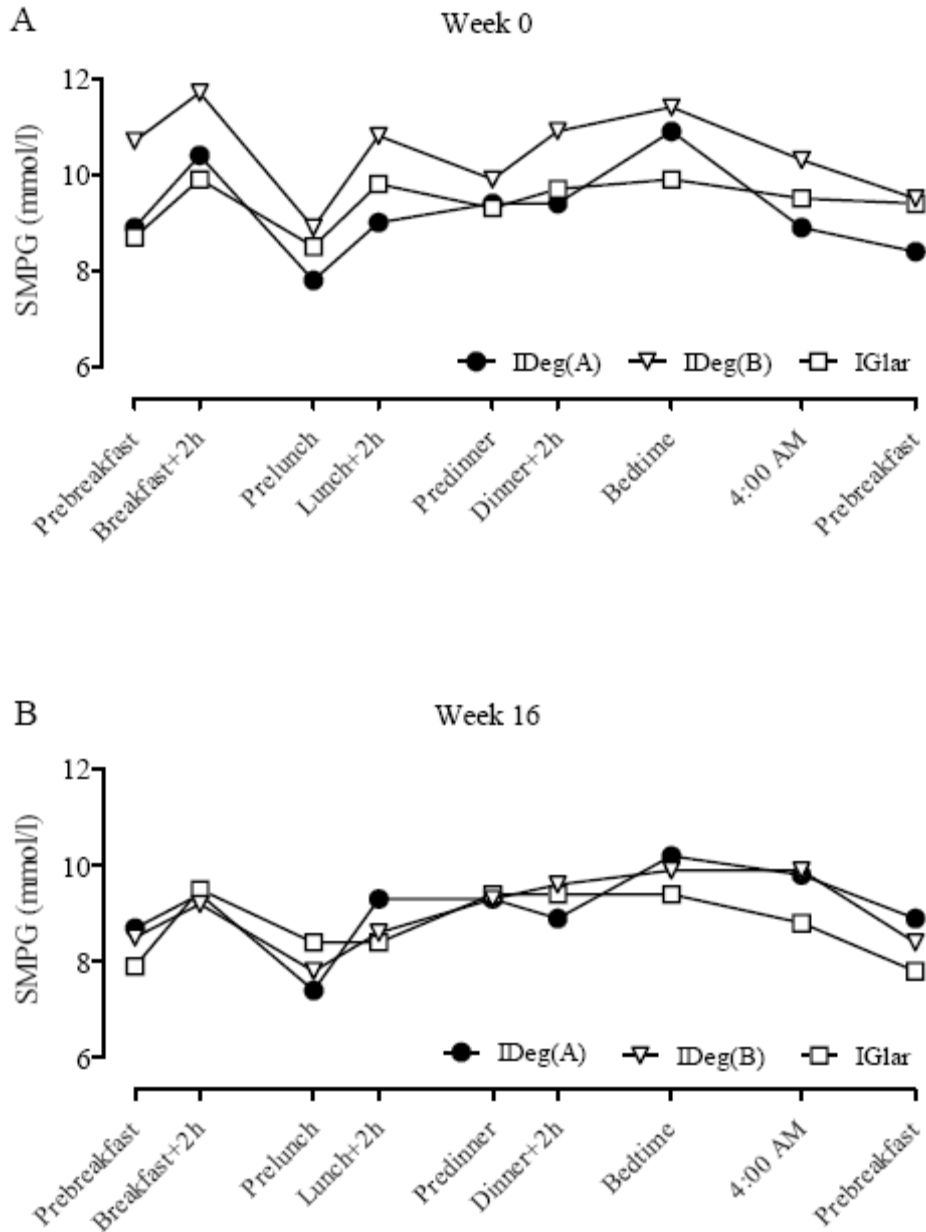

Supplement: supp_dc10-1925v101925_DC101925SupplementaryData.pdf [file supp_dc10-1925v101925_DC101925SupplementaryData.pdf]
